# Supplementary material for: Two Novel er1 Alleles Conferring Powdery Mildew (Erysiphe pisi) Resistance Identified in a Worldwide Collection of Pea (Pisum sativum L.) Germplasms
Source: MDPI journal article supplement (doi:10.3390/ijms20205071), 2019-10-12
Supplement: s1 [file s1]

**Table S1** Genetic analysis of the *Erysiphe pisi*-resistance of the pea germplasms G0004389 and G0004400, which carry the novel alleles, *er1*-8 and *er1*-9, respectively.

| Parents and cross | Generation       | Individuals | No. of plants or families |    |    | Expected ratio and goodness of fit |          |      |
|-------------------|------------------|-------------|---------------------------|----|----|------------------------------------|----------|------|
|                   |                  |             | R                         | Rs | S  | R:Rs:S                             | $\chi^2$ | P    |
| Wsu28             | P1               | 30          | -                         | -  | 30 | -                                  |          |      |
| G0004389          | P2               | 30          | 30                        | -  | -  | -                                  |          |      |
| Wsu28×G0004389    | F <sub>1</sub>   | 6           | -                         | -  | 6  | -                                  |          |      |
|                   | F <sub>2</sub>   | 120         | 30                        | -  | 90 | 1:3                                | 0.01     | 0.92 |
|                   | F <sub>2:3</sub> | 120         | 30                        | 63 | 27 | 1:2:1                              | 0.48     | 0.79 |
| Bawan6            | P1               | 30          | -                         | -  | 30 | -                                  |          |      |
| G0004400          | P2               | 30          | 30                        | -  | -  | -                                  |          |      |
| Bawan 6×G0004400  | F <sub>1</sub>   | 5           |                           |    | 5  |                                    |          |      |
|                   | F <sub>2</sub>   | 119         | 32                        |    | 87 | 1:3                                | 0.14     | 0.71 |
|                   | F <sub>2:3</sub> | 119         | 32                        | 64 | 23 | 1:2:1                              | 2.51     | 0.29 |

R: resistant; S: susceptible; Rs: segregated.
