# Supplementary material for: Two Novel er1 Alleles Conferring Powdery Mildew (Erysiphe pisi) Resistance Identified in a Worldwide Collection of Pea (Pisum sativum L.) Germplasms
Source: MDPI journal article supplement (doi:10.3390/ijms20205071), 2019-10-12
Supplement: s1 [file s1]

**Table S2** Phenotype and functional marker genotype of *er1-8* and *er1-9* at the *er1* locus in 169 pea germplasms, as well as seven germplasms carrying known resistance genes (*er1* alleles and *er2*) and the four parents resistant/susceptible to *E. pisi* with two replications.

| No. | Accession No./<br>Germplasm<br>name | Phenotype              |                         | Marker genotype |              |              |
|-----|-------------------------------------|------------------------|-------------------------|-----------------|--------------|--------------|
|     |                                     | Resistance<br>reaction | Resistance<br>phenotype | InDel-er1-8     | KASPar-er1-8 | KASPar-er1-9 |
| 1   | G0002587                            | 1                      | R                       | 231bp           | TGG:TGG      | T:T          |
| 2   | G0005046                            | 4                      | S                       | 231bp           | TGG:TGG      | T:T          |
| 3   | G0005066                            | 4                      | S                       | 231bp           | TGG:TGG      | T:T          |
| 4   | G0005544                            | 4                      | S                       | 231bp           | TGG:TGG      | T:T          |
| 5   | G0005741                            | 4                      | S                       | 231bp           | TGG:TGG      | T:T          |
| 6   | G0005743                            | 4                      | S                       | 231bp           | TGG:TGG      | T:T          |
| 7   | G0005745                            | 0                      | I                       | 231bp           | TGG:TGG      | T:T          |
| 8   | G0005746                            | 4                      | S                       | 231bp           | TGG:TGG      | T:T          |
| 9   | G0005747                            | 4                      | S                       | 231bp           | TGG:TGG      | T:T          |
| 10  | G0005748                            | 4                      | S                       | 231bp           | TGG:TGG      | T:T          |
| 11  | G0005749                            | 4                      | S                       | 231bp           | TGG:TGG      | T:T          |
| 12  | G0005750                            | 4                      | S                       | 231bp           | TGG:TGG      | T:T          |
| 13  | G0005752                            | 3                      | S                       | 231bp           | TGG:TGG      | T:T          |
| 14  | G0005753                            | 4                      | S                       | 231bp           | TGG:TGG      | T:T          |
| 15  | G0005754                            | 4                      | S                       | 231bp           | TGG:TGG      | T:T          |
| 16  | G0005755                            | 4                      | S                       | 231bp           | TGG:TGG      | T:T          |
| 17  | G0005756                            | 4                      | S                       | 231bp           | TGG:TGG      | T:T          |
| 18  | G0005757                            | 3                      | S                       | 231bp           | TGG:TGG      | T:T          |
| 19  | G0005758                            | 4                      | S                       | 231bp           | TGG:TGG      | T:T          |
| 20  | G0005759                            | 4                      | S                       | 231bp           | TGG:TGG      | T:T          |
| 21  | G0005760                            | 4                      | S                       | 231bp           | TGG:TGG      | T:T          |
| 22  | G0005761                            | 4                      | S                       | 231bp           | TGG:TGG      | T:T          |
| 23  | G0005762                            | 4                      | S                       | 231bp           | TGG:TGG      | T:T          |
| 24  | G0005764                            | 0                      | I                       | 231bp           | TGG:TGG      | T:T          |
| 25  | G0005765                            | 4                      | S                       | 231bp           | TGG:TGG      | T:T          |
| 26  | G0005767                            | 4                      | S                       | 231bp           | TGG:TGG      | T:T          |
| 27  | G0005768                            | 4                      | S                       | 231bp           | TGG:TGG      | T:T          |
| 28  | G0005770                            | 4                      | S                       | 231bp           | TGG:TGG      | T:T          |
| 29  | G0005771                            | 4                      | S                       | 231bp           | TGG:TGG      | T:T          |
| 30  | G0005773                            | 4                      | S                       | 231bp           | TGG:TGG      | T:T          |
| 31  | G0005774                            | 0                      | I                       | 231bp           | TGG:TGG      | T:T          |
| 32  | G0005775                            | 0                      | I                       | 231bp           | TGG:TGG      | T:T          |
| 33  | G0005776                            | 4                      | S                       | 231bp           | TGG:TGG      | T:T          |

|    |          |   |   |       |         |     |
|----|----------|---|---|-------|---------|-----|
| 34 | G0005777 | 4 | S | 231bp | TGG:TGG | T:T |
| 35 | G0005778 | 0 | I | 231bp | TGG:TGG | T:T |
| 36 | G0005783 | 0 | I | 231bp | TGG:TGG | T:T |
| 37 | G0005784 | 4 | S | 231bp | TGG:TGG | T:T |
| 38 | G0005785 | 4 | S | 231bp | TGG:TGG | T:T |
| 39 | G0005786 | 0 | I | 231bp | TGG:TGG | T:T |
| 40 | G0005789 | 4 | S | 231bp | TGG:TGG | T:T |
| 41 | G0005790 | 4 | S | 231bp | TGG:TGG | T:T |
| 42 | G0005792 | 4 | S | 231bp | TGG:TGG | T:T |
| 43 | G0005794 | 0 | I | 231bp | TGG:TGG | T:T |
| 44 | G0005795 | 4 | S | 231bp | TGG:TGG | T:T |
| 45 | G0005798 | 4 | S | 231bp | TGG:TGG | T:T |
| 46 | G0005799 | 4 | S | 231bp | TGG:TGG | T:T |
| 47 | G0005803 | 4 | S | 231bp | TGG:TGG | T:T |
| 48 | G0005805 | 4 | S | 231bp | TGG:TGG | T:T |
| 49 | G0005806 | 4 | S | 231bp | TGG:TGG | T:T |
| 50 | G0005808 | 4 | S | 231bp | TGG:TGG | T:T |
| 51 | G0005810 | 4 | S | 231bp | TGG:TGG | T:T |
| 52 | G0005812 | 4 | S | 231bp | TGG:TGG | T:T |
| 53 | G0005814 | 4 | S | 231bp | TGG:TGG | T:T |
| 54 | G0005815 | 4 | S | 231bp | TGG:TGG | T:T |
| 55 | G0005816 | 4 | S | 231bp | TGG:TGG | T:T |
| 56 | G0005817 | 4 | S | 231bp | TGG:TGG | T:T |
| 57 | G0005819 | 4 | S | 231bp | TGG:TGG | T:T |
| 58 | G0005821 | 4 | S | 231bp | TGG:TGG | T:T |
| 59 | G0005822 | 4 | S | 231bp | TGG:TGG | T:T |
| 60 | G0005823 | 4 | S | 231bp | TGG:TGG | T:T |
| 61 | G0005824 | 4 | S | 231bp | TGG:TGG | T:T |
| 62 | G0005825 | 4 | S | 231bp | TGG:TGG | T:T |
| 63 | G0005826 | 4 | S | 231bp | TGG:TGG | T:T |
| 64 | G0005827 | 4 | S | 231bp | TGG:TGG | T:T |
| 65 | G0005829 | 1 | R | 231bp | TGG:TGG | T:T |
| 66 | G0005830 | 0 | I | 231bp | TGG:TGG | T:T |
| 67 | G0005831 | 1 | R | 231bp | TGG:TGG | T:T |
| 68 | G0005832 | 4 | S | 231bp | TGG:TGG | T:T |
| 69 | G0005833 | 0 | I | 231bp | TGG:TGG | T:T |
| 70 | G0005836 | 3 | S | 231bp | TGG:TGG | T:T |
| 71 | G0005838 | 3 | S | 231bp | TGG:TGG | T:T |
| 72 | G0005839 | 4 | S | 231bp | TGG:TGG | T:T |
| 73 | G0005843 | 0 | I | 231bp | TGG:TGG | T:T |
| 74 | G0005846 | 0 | I | 231bp | TGG:TGG | T:T |
| 75 | G0005849 | 1 | R | 231bp | TGG:TGG | T:T |
| 76 | G0005852 | 4 | S | 231bp | TGG:TGG | T:T |

|     |          |   |   |       |         |     |
|-----|----------|---|---|-------|---------|-----|
| 77  | G0005854 | 3 | S | 231bp | TGG:TGG | T:T |
| 78  | G0005855 | 1 | R | 231bp | TGG:TGG | T:T |
| 79  | G0005861 | 0 | I | 231bp | TGG:TGG | T:T |
| 80  | G0005869 | 4 | S | 231bp | TGG:TGG | T:T |
| 81  | G0005886 | 4 | S | 231bp | TGG:TGG | T:T |
| 82  | G0005901 | 4 | S | 231bp | TGG:TGG | T:T |
| 83  | G0005914 | 4 | S | 231bp | TGG:TGG | T:T |
| 84  | G0005927 | 4 | S | 231bp | TGG:TGG | T:T |
| 85  | G0005938 | 4 | S | 231bp | TGG:TGG | T:T |
| 86  | G0005948 | 3 | S | 231bp | TGG:TGG | T:T |
| 87  | G0005949 | 4 | S | 231bp | TGG:TGG | T:T |
| 88  | G0005953 | 4 | S | 231bp | TGG:TGG | T:T |
| 89  | G0005954 | 4 | S | 231bp | TGG:TGG | T:T |
| 90  | G0005956 | 4 | S | 231bp | TGG:TGG | T:T |
| 91  | G0005957 | 4 | S | 231bp | TGG:TGG | T:T |
| 92  | G0005961 | 4 | S | 231bp | TGG:TGG | T:T |
| 93  | G0005963 | 4 | S | 231bp | TGG:TGG | T:T |
| 94  | G0005965 | 4 | S | 231bp | TGG:TGG | T:T |
| 95  | G0005967 | 1 | R | 231bp | TGG:TGG | T:T |
| 96  | G0005968 | 4 | S | 231bp | TGG:TGG | T:T |
| 97  | G0005969 | 4 | S | 231bp | TGG:TGG | T:T |
| 98  | G0005970 | 4 | S | 231bp | TGG:TGG | T:T |
| 99  | G0005971 | 4 | S | 231bp | TGG:TGG | T:T |
| 100 | G0005972 | 4 | S | 231bp | TGG:TGG | T:T |
| 101 | G0005973 | 4 | S | 231bp | TGG:TGG | T:T |
| 102 | G0005974 | 3 | S | 231bp | TGG:TGG | T:T |
| 103 | G0005975 | 4 | S | 231bp | TGG:TGG | T:T |
| 104 | G0005976 | 4 | S | 231bp | TGG:TGG | T:T |
| 105 | G0005977 | 4 | S | 231bp | TGG:TGG | T:T |
| 106 | G0005978 | 4 | S | 231bp | TGG:TGG | T:T |
| 107 | G0005979 | 4 | S | 231bp | TGG:TGG | T:T |
| 108 | G0005980 | 4 | S | 231bp | TGG:TGG | T:T |
| 109 | G0005981 | 4 | S | 231bp | TGG:TGG | T:T |
| 110 | G0005982 | 3 | S | 231bp | TGG:TGG | T:T |
| 111 | G0005983 | 4 | S | 231bp | TGG:TGG | T:T |
| 112 | G0005984 | 4 | S | 231bp | TGG:TGG | T:T |
| 113 | G0005985 | 4 | S | 231bp | TGG:TGG | T:T |
| 114 | G0005986 | 1 | R | 231bp | TGG:TGG | T:T |
| 115 | G0005989 | 4 | S | 231bp | TGG:TGG | T:T |
| 116 | G0005990 | 0 | I | 231bp | TGG:TGG | T:T |
| 117 | G0005991 | 4 | S | 231bp | TGG:TGG | T:T |
| 118 | G0005994 | 4 | S | 231bp | TGG:TGG | T:T |
| 119 | G0005995 | 3 | S | 231bp | TGG:TGG | T:T |

|     |          |   |   |       |         |     |
|-----|----------|---|---|-------|---------|-----|
| 120 | G0005997 | 4 | S | 231bp | TGG:TGG | T:T |
| 121 | G0005998 | 4 | S | 231bp | TGG:TGG | T:T |
| 122 | G0005999 | 4 | S | 231bp | TGG:TGG | T:T |
| 123 | G0006001 | 4 | S | 231bp | TGG:TGG | T:T |
| 124 | G0006003 | 3 | S | 231bp | TGG:TGG | T:T |
| 125 | G0006005 | 4 | S | 231bp | TGG:TGG | T:T |
| 126 | G0006006 | 1 | R | 231bp | TGG:TGG | T:T |
| 127 | G0006007 | 4 | S | 231bp | TGG:TGG | T:T |
| 128 | G0006009 | 4 | S | 231bp | TGG:TGG | T:T |
| 129 | G0006010 | 4 | S | 231bp | TGG:TGG | T:T |
| 130 | G0006011 | 4 | S | 231bp | TGG:TGG | T:T |
| 131 | G0006012 | 4 | S | 231bp | TGG:TGG | T:T |
| 132 | G0006015 | 4 | S | 231bp | TGG:TGG | T:T |
| 133 | G0006017 | 4 | S | 231bp | TGG:TGG | T:T |
| 134 | G0006018 | 4 | S | 231bp | TGG:TGG | T:T |
| 135 | G0006019 | 1 | R | 231bp | TGG:TGG | T:T |
| 136 | G0006020 | 4 | S | 231bp | TGG:TGG | T:T |
| 137 | G0006021 | 4 | S | 231bp | TGG:TGG | T:T |
| 138 | G0006023 | 4 | S | 231bp | TGG:TGG | T:T |
| 139 | G0006024 | 0 | I | 231bp | TGG:TGG | T:T |
| 140 | G0006026 | 4 | S | 231bp | TGG:TGG | T:T |
| 141 | G0006031 | 3 | S | 231bp | TGG:TGG | T:T |
| 142 | G0006034 | 4 | S | 231bp | TGG:TGG | T:T |
| 143 | G0006035 | 1 | R | 231bp | TGG:TGG | T:T |
| 144 | G0006036 | 1 | R | 231bp | TGG:TGG | T:T |
| 145 | G0006038 | 3 | S | 231bp | TGG:TGG | T:T |
| 146 | G0006039 | 4 | S | 231bp | TGG:TGG | T:T |
| 147 | G0006041 | 0 | I | 231bp | TGG:TGG | T:T |
| 148 | G0006042 | 0 | I | 231bp | TGG:TGG | T:T |
| 149 | G0006043 | 4 | S | 231bp | TGG:TGG | T:T |
| 150 | G0006044 | 0 | I | 231bp | TGG:TGG | T:T |
| 151 | G0006045 | 4 | S | 231bp | TGG:TGG | T:T |
| 152 | G0006046 | 4 | S | 231bp | TGG:TGG | T:T |
| 153 | G0006048 | 4 | S | 231bp | TGG:TGG | T:T |
| 154 | G0006050 | 4 | S | 231bp | TGG:TGG | T:T |
| 155 | G0006051 | 1 | R | 231bp | TGG:TGG | T:T |
| 156 | G0006052 | 1 | R | 231bp | TGG:TGG | T:T |
| 157 | G0006053 | 1 | R | 231bp | TGG:TGG | T:T |
| 158 | G0006054 | 4 | S | 231bp | TGG:TGG | T:T |
| 159 | G0006055 | 3 | S | 231bp | TGG:TGG | T:T |
| 160 | G0006056 | 1 | R | 231bp | TGG:TGG | T:T |
| 161 | G0006057 | 1 | R | 231bp | TGG:TGG | T:T |
| 162 | G0006058 | 1 | R | 231bp | TGG:TGG | T:T |

|     |          |   |   |       |         |     |
|-----|----------|---|---|-------|---------|-----|
| 163 | G0006059 | 1 | R | 231bp | TGG:TGG | T:T |
| 164 | G0006060 | 1 | R | 231bp | TGG:TGG | T:T |
| 165 | G0006061 | 1 | R | 231bp | TGG:TGG | T:T |
| 166 | G0006062 | 4 | S | 231bp | TGG:TGG | T:T |
| 167 | G0006063 | 0 | I | 231bp | TGG:TGG | T:T |
| 168 | G0006065 | 1 | R | 231bp | TGG:TGG | T:T |
| 169 | G0006070 | 1 | R | 231bp | TGG:TGG | T:T |
| 170 | Tara     | 0 | I | 231bp | TGG:TGG | T:T |
| 171 | Xuca1    | 0 | I | 231bp | TGG:TGG | T:T |
| 172 | Jl210    | 0 | I | 231bp | TGG:TGG | T:T |
| 173 | YI       | 0 | I | 231bp | TGG:TGG | T:T |
| 174 | G0001778 | 0 | I | 231bp | TGG:TGG | T:T |
| 175 | DDR11    | 0 | I | 231bp | TGG:TGG | T:T |
| 176 | GI2480   | 4 | S | 231bp | TGG:TGG | T:T |
| 177 | WSU28    | 4 | S | 231bp | TGG:TGG | T:T |
| 178 | WSU28    | 4 | S | 231bp | TGG:TGG | T:T |
| 179 | G0004389 | 0 | I | 228bp | -:-     | T:T |
| 180 | G0004389 | 0 | I | 228bp | -:-     | T:T |
| 181 | Bawan 6  | 4 | S | 231bp | TGG:TGG | T:T |
| 182 | Bawan 6  | 4 | S | 231bp | TGG:TGG | T:T |
| 183 | G0004400 | 0 | I | 231bp | TGG:TGG | -:- |
| 184 | G0004400 | 0 | I | 231bp | TGG:TGG | -:- |
